# Supplementary material
Source: bioRxiv or medRxiv preprint supplement (https://medrxiv.org/highwire/filestream/91873/field_highwire_adjunct_files/0/2020.07.31.20165720-1.pdf)
Supplement: Supplementary file [file 2020.07.31.20165720-1.pdf]

**Appendix 1:****Clinical Trial sites and Transfusion centers**

| <b>CLINICAL SITES</b> |                                      |             |
|-----------------------|--------------------------------------|-------------|
| <b>#</b>              | <b>NAME</b>                          | <b>CITY</b> |
| 1                     | H. U. Puerta de Hierro Majadahonda   | Madrid      |
| 2                     | H. U.12 de Octubre                   | Madrid      |
| 3                     | H. U. Ramón y Cajal                  | Madrid      |
| 4                     | H. U. Clínico San Carlos             | Madrid      |
| 5                     | H. C. U. Lozano Blesa Zaragoza       | Zaragoza    |
| 6                     | H. U. Severo Ochoa                   | Madrid      |
| 7                     | H. U. Príncipe de Asturias           | Madrid      |
| 8                     | H. U. Gregorio Marañón               | Madrid      |
| 9                     | H. U. La Princesa                    | Madrid      |
| 10                    | H. del Mar                           | Barcelona   |
| 11                    | H. U. de Asturias                    | Oviedo      |
| 12                    | H. U. Marqués de Valdecilla          | Santander   |
| 13                    | H. Clínico U. de Valladolid          | Valladolid  |
| 14                    | H. U. Salamanca                      | Salamanca   |
| 15                    | Complejo H. de Navarra               | Pamplona    |
| 16                    | H.U. HM Sanchinarro                  | Madrid      |
| 17                    | Complejo hospitalario de Toledo      | Toledo      |
| 18                    | Clínica Universidad de Navarra (CUN) | Pamplona    |
| 19                    | H. General de Albacete               | Albacete    |
| 20                    | H. General U. de Ciudad Real         | Ciudad Real |
| 21                    | H. U. Miguel Servet                  | Zaragoza    |
| 22                    | Complejo Asistencial U. de León      | León        |
| 23                    | Hospital General U. de Valencia      | Valencia    |

|                            |                                                         |             |
|----------------------------|---------------------------------------------------------|-------------|
| 24                         | H. U. Arnau de Vilanova                                 | Lleida      |
| 25                         | H Sant Joan de Deu de Manresa. Fundació Althaia         | Manresa     |
| 26                         | H. U. Sant Joan de Reus                                 | Reus        |
| 27                         | H San Pedro                                             | Logroño     |
| 28                         | H. Dr Josep Trueta                                      | Girona      |
| 29                         | H. Dr. Negrín                                           | Las Palmas  |
| 30                         | H. U. Mútua Terrassa                                    | Terrasa     |
| 31                         | H. U. Quironsalud Pozuelo                               | Madrid      |
| 32                         | H. U. Donostia                                          | Donostia    |
| <b>TRANSFUSION CENTERS</b> |                                                         |             |
| <b>#</b>                   | <b>NAME</b>                                             | <b>CITY</b> |
| 1                          | Centro de Transfusión de la Comunidad de Madrid (CTCM)  | Madrid      |
| 2                          | Centro de Transfusión de las Fuerzas Armadas (CTFA)     | Madrid      |
| 3                          | Banco de Sangre y Tejidos Aragón                        | Zaragoza    |
| 4                          | Banco de Sangre y Tejidos de Cantabria                  | Santander   |
| 5                          | Centro Comunitario de Sangre y Tejidos de Asturias      | Oviedo      |
| 6                          | Banc de Sang i Teixits de Catalunya                     | Barcelona   |
| 7                          | Banco de Sangre de La Rioja                             | Logroño     |
| 8                          | Centro de Hemoterapia y Hemodonación de Castilla y León | Valladolid  |
| 9                          | Banco de Sangre y Tejidos de Navarra                    | Pamplona    |
| 10                         | Centro de Transfusión de Albacete y Cuenca              | Albacete    |
| 11                         | Centro regional de Transfusión Toledo-Guadalajara       | Toledo      |
| 12                         | Centro de Transfusión de Ciudad Real                    | Ciudad Real |
| 13                         | Instituto Canario de Hemodonación                       | Las Palmas  |
